# Supplementary material
Source: HighWire-hosted journal article supplement (https://bmjopen.bmj.com/content/13/5/e071235)
Supplement: inline-supplementary-material-2 [file inline-supplementary-material-2.pdf]

**Supplementary Table***Timeline of the study and data collection*

|                                            | <b>Study Period</b> |               |                    |    |    |    |    |    |    |    |    |     |     |     |     |                                                                 |                                          |   |   |
|--------------------------------------------|---------------------|---------------|--------------------|----|----|----|----|----|----|----|----|-----|-----|-----|-----|-----------------------------------------------------------------|------------------------------------------|---|---|
|                                            | Enrolment           | Randomization | Support (13 weeks) |    |    |    |    |    |    |    |    |     |     |     |     | Post-support<br>(immediately<br>after program<br>participation) | Follow-up (3<br>months post-<br>support) |   |   |
| <b>Timepoints</b>                          | –                   | 0             | W1                 | W2 | W3 | W4 | W5 | W6 | W7 | W8 | W9 | W10 | W11 | W12 | W13 | W14                                                             | W38                                      |   |   |
| <b>Study procedures</b>                    |                     |               |                    |    |    |    |    |    |    |    |    |     |     |     |     |                                                                 |                                          |   |   |
| Eligibility screening (30 min)             | X                   |               |                    |    |    |    |    |    |    |    |    |     |     |     |     |                                                                 |                                          |   |   |
| SACS-R/SACS-PR (<30 min)                   | X                   |               |                    |    |    |    |    |    |    |    |    |     |     |     |     |                                                                 |                                          |   |   |
| Informed consent (30 min)                  | X                   |               |                    |    |    |    |    |    |    |    |    |     |     |     |     |                                                                 |                                          |   |   |
| <b>Randomization</b>                       |                     | X             |                    |    |    |    |    |    |    |    |    |     |     |     |     |                                                                 |                                          |   |   |
| <b>Supports</b>                            |                     |               |                    |    |    |    |    |    |    |    |    |     |     |     |     |                                                                 |                                          |   |   |
| ACT                                        |                     | X             | G                  | O  | G  | O  | G  | O  | G  | O  | G  | O   | G   | O   | G   |                                                                 |                                          |   |   |
| NDBI                                       |                     | X             | G                  | O  | G  | O  | G  | O  | G  | O  | G  | O   | G   | O   | G   |                                                                 |                                          |   |   |
| ACT + NDBI                                 |                     | X             | GO                 | GO | GO | GO | GO | GO | GO | GO | GO | GO  | GO  | GO  | GO  |                                                                 |                                          |   |   |
| <b>Outcome data collection</b>             |                     |               |                    |    |    |    |    |    |    |    |    |     |     |     |     |                                                                 |                                          |   |   |
| Child-caregiver interaction video (10 min) | X                   |               |                    |    |    |    |    |    |    |    |    |     |     |     |     |                                                                 |                                          | X | X |

|                                                                                  |   |   |   |   |   |   |   |   |   |   |   |   |   |   |   |   |   |   |   |   |
|----------------------------------------------------------------------------------|---|---|---|---|---|---|---|---|---|---|---|---|---|---|---|---|---|---|---|---|
| <b>Child engagement</b>                                                          | X |   |   |   |   |   |   |   |   |   |   |   |   |   |   |   |   | X | X |   |
| <b>Child language</b>                                                            | X |   |   |   |   |   |   |   |   |   |   |   |   |   |   |   |   |   | X | X |
| <b>Caregiver application of NDBI</b>                                             | X |   |   |   |   |   |   |   |   |   |   |   |   |   |   |   |   |   | X | X |
| <b>IOA</b>                                                                       |   | X | X | X | X | X | X | X | X | X | X | X | X | X | X | X | X | X | X | X |
| <b>Vineland-3 (45 min)</b>                                                       | X |   |   |   |   |   |   |   |   |   |   |   |   |   |   |   |   |   | X | X |
| <b>CBCL/1.5-5 (20 min)</b>                                                       | X |   |   |   |   |   |   |   |   |   |   |   |   |   |   |   |   |   | X | X |
| <b>PSI-4-SF (5 min)</b>                                                          | X |   |   |   |   |   |   |   |   |   |   |   |   |   |   |   |   |   | X | X |
| <b>DASS- 21 (10 min)</b>                                                         | X |   |   |   |   |   |   |   |   |   |   |   |   |   |   |   |   |   | X | X |
| <b>PAAQ (10 min)</b>                                                             | X |   |   |   |   |   |   |   |   |   |   |   |   |   |   |   |   |   | X | X |
| <b>PSOC (10 min)</b>                                                             | X |   |   |   |   |   |   |   |   |   |   |   |   |   |   |   |   |   | X | X |
| <b>Caregiver log of NDBI and/or ACT practices (5 min weekly)</b>                 |   |   | X | X | X | X | X | X | X | X | X | X | X | X | X | X | X | X | X | X |
| <b>Log of caregiver &amp; child professional support received (5 min weekly)</b> |   |   | X | X | X | X | X | X | X | X | X | X | X | X | X | X | X | X | X | X |

|                          |   |   |   |   |   |   |   |   |   |   |   |   |   |   |
|--------------------------|---|---|---|---|---|---|---|---|---|---|---|---|---|---|
| <b>Website analytics</b> | X | X | X | X | X | X | X | X | X | X | X | X | X | X |
|--------------------------|---|---|---|---|---|---|---|---|---|---|---|---|---|---|

|                                                |   |   |   |   |   |   |   |   |   |   |   |   |   |   |
|------------------------------------------------|---|---|---|---|---|---|---|---|---|---|---|---|---|---|
| <b>Therapist support fidelity rating scale</b> | X | X | X | X | X | X | X | X | X | X | X | X | X | X |
|------------------------------------------------|---|---|---|---|---|---|---|---|---|---|---|---|---|---|

|                        |  |  |  |  |  |  |  |  |  |  |  |  |  |  |   |
|------------------------|--|--|--|--|--|--|--|--|--|--|--|--|--|--|---|
| <b>TARF-R (10 min)</b> |  |  |  |  |  |  |  |  |  |  |  |  |  |  | X |
|------------------------|--|--|--|--|--|--|--|--|--|--|--|--|--|--|---|

|                                        |  |  |  |  |  |  |  |  |  |  |  |  |  |  |  |   |
|----------------------------------------|--|--|--|--|--|--|--|--|--|--|--|--|--|--|--|---|
| <b>Post-support interview (30 min)</b> |  |  |  |  |  |  |  |  |  |  |  |  |  |  |  | X |
|----------------------------------------|--|--|--|--|--|--|--|--|--|--|--|--|--|--|--|---|

*Note.* SACS-R = Social Attention and Communication Surveillance–Revised; SACS-PR = SACS-Preschool; W = week; G = 2 hour group session (video); O = 1 hour online module; IOA = Interobserver Agreement; Vineland-3 = Vineland Adaptive Behavior Scales, Third Edition; CBCL/1.5-5 = Child Behavior Checklist for Ages 1.5-5; PSI-4-SF = Parenting Stress Index – Fourth Edition, Short Form; DASS-21 = Depression, Anxiety, and Stress Scale – 21; PAAQ = Parental Acceptance and Action Questionnaire; PSOC = Parent Sense of Competence Scale; TARF-R = Treatment Acceptability Rating Form-Revised; Approximate time for participants to complete assessments is noted in parentheses. Adapted from the SPIRIT (2013) template.
